# Supplementary material
Source: publisher figshare collection journal article supplement (https://acs.figshare.com/ndownloader/files/4049083)
Supplement: Supplementary file 1 [file 4049083]

data_shelxl
 
_audit_creation_method            SHELXL-97
_chemical_name_systematic
;
 ?
;
_chemical_name_common             ?
_chemical_melting_point           ?
_chemical_formula_moiety          ?
_chemical_formula_sum
 'C34 H52 N4 O10'
_chemical_formula_weight          676.80
 
loop_
 _atom_type_symbol
 _atom_type_description
 _atom_type_scat_dispersion_real
 _atom_type_scat_dispersion_imag
 _atom_type_scat_source
 'C'  'C'   0.0033   0.0016
 'International Tables Vol C Tables 4.2.6.8 and 6.1.1.4'
 'H'  'H'   0.0000   0.0000
 'International Tables Vol C Tables 4.2.6.8 and 6.1.1.4'
 'N'  'N'   0.0061   0.0033
 'International Tables Vol C Tables 4.2.6.8 and 6.1.1.4'
 'O'  'O'   0.0106   0.0060
 'International Tables Vol C Tables 4.2.6.8 and 6.1.1.4'
 
_symmetry_cell_setting            Triclinic
_symmetry_space_group_name_H-M    P-1
 
loop_
 _symmetry_equiv_pos_as_xyz
 'x, y, z'
 '-x, -y, -z'
 
_cell_length_a                    10.486
_cell_length_b                    12.302
_cell_length_c                    15.444
_cell_angle_alpha                 74.81
_cell_angle_beta                  87.50
_cell_angle_gamma                 89.97
_cell_volume                      1920.7
_cell_formula_units_Z             2
_cell_measurement_temperature     293(2)
_cell_measurement_reflns_used     651
_cell_measurement_theta_min       2.7313
_cell_measurement_theta_max       29.7849
 
_exptl_crystal_description        Prism
_exptl_crystal_colour             Colorless
_exptl_crystal_size_max           0.4
_exptl_crystal_size_mid           0.3
_exptl_crystal_size_min           0.2
_exptl_crystal_density_meas       ?
_exptl_crystal_density_diffrn     1.170
_exptl_crystal_density_method     'not measured'
_exptl_crystal_F_000              728
_exptl_absorpt_coefficient_mu     0.086
_exptl_absorpt_correction_type    'multi-scan'
_exptl_absorpt_correction_T_min   0.90887
_exptl_absorpt_correction_T_max   1.00000
_exptl_absorpt_process_details    ?
 
_exptl_special_details
;
 ?
;
 
_diffrn_ambient_temperature       293(2)
_diffrn_radiation_wavelength      0.71073
_diffrn_radiation_type            MoK\a
_diffrn_radiation_source          'fine-focus sealed tube'
_diffrn_radiation_monochromator   graphite
_diffrn_measurement_device_type   'Xcalibur, Sapphire3'
_diffrn_measurement_method        ?
_diffrn_detector_area_resol_mean  16.1340
_diffrn_standards_number          ?
_diffrn_standards_interval_count  ?
_diffrn_standards_interval_time   ?
_diffrn_standards_decay_%         ?
_diffrn_reflns_number             9367
_diffrn_reflns_av_R_equivalents   0.0281
_diffrn_reflns_av_sigmaI/netI     0.0736
_diffrn_reflns_limit_h_min        -14
_diffrn_reflns_limit_h_max        8
_diffrn_reflns_limit_k_min        -9
_diffrn_reflns_limit_k_max        16
_diffrn_reflns_limit_l_min        -20
_diffrn_reflns_limit_l_max        20
_diffrn_reflns_theta_min          2.74
_diffrn_reflns_theta_max          29.85
_reflns_number_total              6878
_reflns_number_gt                 3167
_reflns_threshold_expression      >2sigma(I)
 
_computing_data_collection        ?
_computing_cell_refinement        ?
_computing_data_reduction         ?
_computing_structure_solution     'SHELXS-97 (Sheldrick, 1990)'
_computing_structure_refinement   'SHELXL-97 (Sheldrick, 1997)'
_computing_molecular_graphics     ?
_computing_publication_material   ?
 
_refine_special_details
;
 Refinement of F^2^ against ALL reflections.  The weighted R-factor wR and
 goodness of fit S are based on F^2^, conventional R-factors R are based
 on F, with F set to zero for negative F^2^. The threshold expression of
 F^2^ > 2sigma(F^2^) is used only for calculating R-factors(gt) etc. and is
 not relevant to the choice of reflections for refinement.  R-factors based
 on F^2^ are statistically about twice as large as those based on F, and R-
 factors based on ALL data will be even larger.
;
 
_refine_ls_structure_factor_coef  Fsqd
_refine_ls_matrix_type            full
_refine_ls_weighting_scheme       calc
_refine_ls_weighting_details
 'calc w=1/[\s^2^(Fo^2^)+(0.1841P)^2^+0.0000P] where P=(Fo^2^+2Fc^2^)/3'
_atom_sites_solution_primary      direct
_atom_sites_solution_secondary    difmap
_atom_sites_solution_hydrogens    geom
_refine_ls_hydrogen_treatment     constr
_refine_ls_extinction_method      none
_refine_ls_extinction_coef        ?
_refine_ls_number_reflns          6878
_refine_ls_number_parameters      433
_refine_ls_number_restraints      0
_refine_ls_R_factor_all           0.1612
_refine_ls_R_factor_gt            0.0898
_refine_ls_wR_factor_ref          0.3620
_refine_ls_wR_factor_gt           0.2745
_refine_ls_goodness_of_fit_ref    1.063
_refine_ls_restrained_S_all       1.063
_refine_ls_shift/su_max           0.003
_refine_ls_shift/su_mean          0.001
 
loop_
 _atom_site_label
 _atom_site_type_symbol
 _atom_site_fract_x
 _atom_site_fract_y
 _atom_site_fract_z
 _atom_site_U_iso_or_equiv
 _atom_site_adp_type
 _atom_site_occupancy
 _atom_site_symmetry_multiplicity
 _atom_site_calc_flag
 _atom_site_refinement_flags
 _atom_site_disorder_assembly
 _atom_site_disorder_group
N1 N -0.7980(3) -0.2223(3) 0.8533(2) 0.0568(9) Uani 1 1 d . . .
N4 N -0.4573(3) 0.3068(3) 0.4205(2) 0.0609(9) Uani 1 1 d . . .
N3 N -0.2980(3) 0.2231(3) 0.6464(2) 0.0602(9) Uani 1 1 d . . .
N2 N -0.9561(3) -0.3069(3) 1.0801(2) 0.0614(9) Uani 1 1 d . . .
C3 C -0.8097(3) -0.1461(3) 0.7584(3) 0.0525(10) Uani 1 1 d . . .
C4 C -0.8861(4) -0.2287(4) 0.9170(3) 0.0614(11) Uani 1 1 d . . .
C5 C -0.3109(3) 0.1462(4) 0.7419(3) 0.0535(10) Uani 1 1 d . . .
O3 O -0.9861(3) -0.1734(4) 0.9027(2) 0.0949(12) Uani 1 1 d . . .
C6 C -0.3867(4) 0.2283(4) 0.5828(3) 0.0627(11) Uani 1 1 d . . .
C102 C -0.7374(4) -0.0459(4) 0.7298(3) 0.0601(11) Uani 1 1 d . . .
C7 C -0.2371(4) 0.0469(4) 0.7704(3) 0.0586(10) Uani 1 1 d . . .
C100 C -0.8915(4) -0.1763(3) 0.6986(3) 0.0570(10) Uani 1 1 d . . .
O4 O -0.4861(3) 0.1734(3) 0.5977(2) 0.0926(12) Uani 1 1 d . . .
C8 C -0.7472(4) 0.0248(4) 0.6383(3) 0.0674(12) Uani 1 1 d . . .
H8 H -0.6998 0.0915 0.6204 0.081 Uiso 1 1 calc R . .
C101 C -0.8259(4) -0.0043(4) 0.5763(3) 0.0703(12) Uani 1 1 d . . .
H101 H -0.8302 0.0403 0.5178 0.084 Uiso 1 1 calc R . .
C9 C -0.3928(4) 0.1761(3) 0.8016(3) 0.0579(10) Uani 1 1 d . . .
O1 O -0.4343(4) 0.3479(4) 1.1109(4) 0.1304(19) Uani 1 1 d . . .
C11 C -0.8970(4) -0.1035(4) 0.6073(3) 0.0636(11) Uani 1 1 d . . .
H11 H -0.9506 -0.1245 0.5679 0.076 Uiso 1 1 calc R . .
C12 C -0.3253(4) 0.0040(4) 0.9230(3) 0.0693(12) Uani 1 1 d . . .
H12 H -0.3326 -0.0398 0.9821 0.083 Uiso 1 1 calc R . .
C104 C -0.2465(4) -0.0245(4) 0.8610(3) 0.0692(12) Uani 1 1 d . . .
H104 H -0.1985 -0.0898 0.8767 0.083 Uiso 1 1 calc R . .
C13 C -0.7480(5) 0.3715(5) 0.5051(4) 0.0911(18) Uani 1 1 d . . .
C14 C -0.7517(5) 0.3713(5) 1.0059(4) 0.0915(18) Uani 1 1 d . . .
C15 C -0.3964(4) 0.1040(4) 0.8932(3) 0.0673(12) Uani 1 1 d . . .
H15 H -0.4495 0.1253 0.9355 0.081 Uiso 1 1 calc R . .
010 O -1.0661(4) 0.3488(5) 0.6107(4) 0.1335(19) Uani 1 1 d . . .
C17 C -0.4724(5) 0.2816(4) 0.7689(4) 0.0806(14) Uani 1 1 d . . .
H17A H -0.5259 0.2928 0.8178 0.121 Uiso 1 1 calc R . .
H17B H -0.5246 0.2727 0.7216 0.121 Uiso 1 1 calc R . .
H17C H -0.4167 0.3457 0.7466 0.121 Uiso 1 1 calc R . .
C18 C -0.6499(5) -0.0166(5) 0.7962(4) 0.0871(16) Uani 1 1 d . . .
H18A H -0.6060 0.0532 0.7683 0.131 Uiso 1 1 calc R . .
H18B H -0.5887 -0.0753 0.8142 0.131 Uiso 1 1 calc R . .
H18C H -0.6995 -0.0089 0.8479 0.131 Uiso 1 1 calc R . .
O2 O -0.5041(6) 0.2974(5) 0.9973(4) 0.161(2) Uani 1 1 d . . .
C20 C -0.1502(5) 0.0159(5) 0.7042(4) 0.0891(16) Uani 1 1 d . . .
H20A H -0.1070 -0.0523 0.7322 0.134 Uiso 1 1 calc R . .
H20B H -0.0885 0.0752 0.6813 0.134 Uiso 1 1 calc R . .
H20C H -0.1980 0.0043 0.6557 0.134 Uiso 1 1 calc R . .
C21 C -0.9725(5) -0.2822(4) 0.7321(4) 0.0819(15) Uani 1 1 d . . .
H21A H -1.0228 -0.2927 0.6844 0.123 Uiso 1 1 calc R . .
H21B H -1.0280 -0.2750 0.7814 0.123 Uiso 1 1 calc R . .
H21C H -0.9181 -0.3459 0.7518 0.123 Uiso 1 1 calc R . .
C22 C -0.8563(4) -0.3117(4) 1.0132(3) 0.0678(12) Uani 1 1 d . . .
H22A H -0.8492 -0.3883 1.0078 0.081 Uiso 1 1 calc R . .
H22B H -0.7753 -0.2903 1.0324 0.081 Uiso 1 1 calc R . .
C23 C -0.3565(4) 0.3130(4) 0.4878(3) 0.0688(12) Uani 1 1 d . . .
H23A H -0.3525 0.3891 0.4945 0.083 Uiso 1 1 calc R . .
H23B H -0.2736 0.2958 0.4646 0.083 Uiso 1 1 calc R . .
C24 C -0.4561(5) 0.4172(4) 0.3362(3) 0.0813(15) Uani 1 1 d . . .
H24A H -0.5228 0.4083 0.2968 0.098 Uiso 1 1 calc R . .
H24B H -0.4773 0.4820 0.3585 0.098 Uiso 1 1 calc R . .
07 O -0.6425(4) 0.4096(5) 0.5093(4) 0.154(2) Uani 1 1 d . . .
C26 C -0.4465(5) 0.1985(4) 0.3948(4) 0.0794(14) Uani 1 1 d . . .
H26A H -0.4318 0.1381 0.4479 0.095 Uiso 1 1 calc R . .
H26B H -0.3736 0.2027 0.3531 0.095 Uiso 1 1 calc R . .
O6 O -0.7240(6) 0.3210(4) 0.9466(3) 0.153(2) Uani 1 1 d . . .
C28 C -0.9568(5) -0.4159(4) 1.1641(3) 0.0815(14) Uani 1 1 d . . .
H28A H -1.0273 -0.4091 1.2052 0.098 Uiso 1 1 calc R . .
H28B H -0.9742 -0.4814 1.1425 0.098 Uiso 1 1 calc R . .
C29 C -0.9461(5) -0.1974(4) 1.1037(4) 0.0742(13) Uani 1 1 d . . .
H29A H -0.8756 -0.2001 1.1429 0.089 Uiso 1 1 calc R . .
H29B H -0.9284 -0.1375 1.0495 0.089 Uiso 1 1 calc R . .
C30 C -0.9783(5) 0.3401(5) 0.5612(4) 0.0880(16) Uani 1 1 d . . .
08 O -0.7766(6) 0.3204(4) 0.4475(3) 0.154(2) Uani 1 1 d . . .
O5 O -0.8575(5) 0.4093(5) 1.0094(4) 0.151(2) Uani 1 1 d . . .
C33 C -0.5211(5) 0.3417(5) 1.0611(4) 0.0834(15) Uani 1 1 d . . .
09 O -0.9960(6) 0.2985(5) 0.4957(4) 0.160(2) Uani 1 1 d . . .
C36 C -1.0632(5) -0.1730(7) 1.1485(5) 0.124(3) Uani 1 1 d . . .
H36A H -1.0542 -0.1022 1.1629 0.187 Uiso 1 1 calc R . .
H36B H -1.0801 -0.2316 1.2027 0.187 Uiso 1 1 calc R . .
H36C H -1.1328 -0.1692 1.1095 0.187 Uiso 1 1 calc R . .
C37 C -0.3332(5) 0.4414(5) 0.2820(3) 0.0856(15) Uani 1 1 d . . .
H37A H -0.3420 0.5075 0.2333 0.128 Uiso 1 1 calc R . .
H37B H -0.3117 0.3785 0.2584 0.128 Uiso 1 1 calc R . .
H37C H -0.2669 0.4536 0.3194 0.128 Uiso 1 1 calc R . .
C38 C -0.8335(5) -0.4390(5) 1.2185(3) 0.0877(16) Uani 1 1 d . . .
H38A H -0.8461 -0.5052 1.2675 0.131 Uiso 1 1 calc R . .
H38B H -0.8153 -0.3757 1.2415 0.131 Uiso 1 1 calc R . .
H38C H -0.7633 -0.4503 1.1799 0.131 Uiso 1 1 calc R . .
C39 C -0.8466(5) 0.3821(6) 0.5714(5) 0.102(2) Uani 1 1 d . . .
H39A H -0.8525 0.4610 0.5706 0.123 Uiso 1 1 calc R . .
H39B H -0.8187 0.3420 0.6302 0.123 Uiso 1 1 calc R . .
C40 C -0.5640(5) 0.1724(7) 0.3524(5) 0.126(3) Uani 1 1 d . . .
H40A H -0.5535 0.1022 0.3368 0.189 Uiso 1 1 calc R . .
H40B H -0.5779 0.2314 0.2991 0.189 Uiso 1 1 calc R . .
H40C H -0.6361 0.1668 0.3939 0.189 Uiso 1 1 calc R . .
C200 C -0.6542(5) 0.3801(6) 1.0713(5) 0.102(2) Uani 1 1 d . . .
H20D H -0.6492 0.4586 1.0719 0.122 Uiso 1 1 calc R . .
H20E H -0.6875 0.3386 1.1303 0.122 Uiso 1 1 calc R . .
 
loop_
 _atom_site_aniso_label
 _atom_site_aniso_U_11
 _atom_site_aniso_U_22
 _atom_site_aniso_U_33
 _atom_site_aniso_U_23
 _atom_site_aniso_U_13
 _atom_site_aniso_U_12
N1 0.0474(17) 0.065(2) 0.056(2) -0.0144(16) 0.0029(16) 0.0034(16)
N4 0.0515(19) 0.073(2) 0.061(2) -0.0226(18) -0.0004(17) 0.0114(18)
N3 0.0461(18) 0.074(2) 0.060(2) -0.0180(18) -0.0022(17) -0.0047(18)
N2 0.0547(19) 0.072(2) 0.061(2) -0.0244(18) 0.0027(17) -0.0072(18)
C3 0.0420(19) 0.059(2) 0.059(2) -0.0218(19) 0.0033(18) 0.0040(19)
C4 0.049(2) 0.073(3) 0.062(3) -0.017(2) 0.001(2) 0.006(2)
C5 0.0362(18) 0.067(2) 0.062(2) -0.025(2) -0.0026(18) -0.0057(19)
O3 0.0679(19) 0.134(3) 0.074(2) -0.014(2) 0.0066(17) 0.047(2)
C6 0.051(2) 0.072(3) 0.065(3) -0.018(2) 0.004(2) -0.007(2)
C102 0.047(2) 0.067(3) 0.074(3) -0.033(2) 0.001(2) -0.003(2)
C7 0.042(2) 0.068(2) 0.072(3) -0.030(2) 0.001(2) 0.001(2)
C100 0.046(2) 0.061(2) 0.069(3) -0.025(2) 0.000(2) 0.001(2)
O4 0.065(2) 0.125(3) 0.078(2) -0.009(2) -0.0049(18) -0.041(2)
C8 0.058(2) 0.062(2) 0.080(3) -0.015(2) 0.004(2) -0.005(2)
C101 0.057(2) 0.077(3) 0.071(3) -0.009(2) 0.005(2) -0.001(3)
C9 0.0414(19) 0.059(2) 0.079(3) -0.028(2) 0.004(2) -0.0029(19)
O1 0.073(2) 0.161(4) 0.187(5) -0.091(4) -0.044(3) 0.040(3)
C11 0.049(2) 0.078(3) 0.070(3) -0.031(2) -0.004(2) -0.004(2)
C12 0.062(3) 0.079(3) 0.062(3) -0.011(2) 0.003(2) -0.004(2)
C104 0.058(2) 0.063(3) 0.084(3) -0.015(2) -0.003(2) 0.007(2)
C13 0.073(3) 0.084(4) 0.104(4) -0.009(3) 0.035(3) 0.020(3)
C14 0.071(3) 0.087(3) 0.113(5) -0.012(3) -0.049(3) -0.016(3)
C15 0.050(2) 0.085(3) 0.075(3) -0.039(3) 0.007(2) 0.004(2)
010 0.074(2) 0.167(4) 0.184(5) -0.097(4) 0.051(3) -0.037(3)
C17 0.069(3) 0.085(3) 0.095(4) -0.036(3) -0.004(3) 0.019(3)
C18 0.068(3) 0.104(4) 0.102(4) -0.047(3) -0.004(3) -0.022(3)
O2 0.192(5) 0.181(5) 0.142(4) -0.099(4) -0.004(4) 0.069(4)
C20 0.076(3) 0.106(4) 0.099(4) -0.052(3) 0.009(3) 0.028(3)
C21 0.065(3) 0.078(3) 0.108(4) -0.033(3) 0.001(3) -0.020(3)
C22 0.053(2) 0.078(3) 0.072(3) -0.021(2) -0.003(2) 0.012(2)
C23 0.058(2) 0.077(3) 0.070(3) -0.018(2) 0.002(2) -0.010(2)
C24 0.097(4) 0.079(3) 0.065(3) -0.013(2) -0.007(3) 0.032(3)
07 0.080(3) 0.177(5) 0.203(6) -0.055(4) 0.047(3) 0.008(3)
C26 0.069(3) 0.078(3) 0.098(4) -0.038(3) 0.011(3) 0.004(3)
O6 0.234(6) 0.127(4) 0.123(4) -0.067(3) -0.063(4) -0.002(4)
C28 0.095(4) 0.075(3) 0.070(3) -0.012(2) 0.008(3) -0.016(3)
C29 0.069(3) 0.073(3) 0.086(3) -0.031(3) -0.005(3) -0.001(3)
C30 0.077(3) 0.089(4) 0.102(4) -0.035(3) 0.010(3) -0.019(3)
08 0.228(6) 0.128(4) 0.123(4) -0.071(3) 0.063(4) -0.004(4)
O5 0.081(3) 0.178(5) 0.194(6) -0.043(4) -0.042(4) -0.006(3)
C33 0.072(3) 0.086(3) 0.098(4) -0.035(3) -0.007(3) 0.021(3)
09 0.186(5) 0.186(5) 0.139(4) -0.099(4) 0.010(4) -0.077(5)
C36 0.084(4) 0.180(7) 0.139(6) -0.098(6) 0.018(4) 0.004(4)
C37 0.104(4) 0.090(3) 0.063(3) -0.023(3) 0.016(3) -0.008(3)
C38 0.100(4) 0.103(4) 0.062(3) -0.023(3) -0.016(3) 0.007(3)
C39 0.070(3) 0.127(5) 0.127(5) -0.068(4) 0.025(3) -0.015(3)
C40 0.084(4) 0.172(7) 0.159(7) -0.109(6) -0.011(4) -0.014(4)
C200 0.073(3) 0.132(5) 0.121(5) -0.069(4) -0.014(4) 0.014(4)
 
_geom_special_details
;
 All esds (except the esd in the dihedral angle between two l.s. planes)
 are estimated using the full covariance matrix.  The cell esds are taken
 into account individually in the estimation of esds in distances, angles
 and torsion angles; correlations between esds in cell parameters are only
 used when they are defined by crystal symmetry.  An approximate (isotropic)
 treatment of cell esds is used for estimating esds involving l.s. planes.
;
 
loop_
 _geom_bond_atom_site_label_1
 _geom_bond_atom_site_label_2
 _geom_bond_distance
 _geom_bond_site_symmetry_2
 _geom_bond_publ_flag
N1 C4 1.307(5) . ?
N1 C3 1.529(5) . ?
N4 C26 1.488(5) . ?
N4 C23 1.531(6) . ?
N4 C24 1.616(6) . ?
N3 C6 1.372(5) . ?
N3 C5 1.530(5) . ?
N2 C22 1.450(5) . ?
N2 C29 1.491(5) . ?
N2 C28 1.603(6) . ?
C3 C102 1.405(6) . ?
C3 C100 1.406(5) . ?
C4 O3 1.246(5) . ?
C4 C22 1.610(6) . ?
C5 C9 1.354(5) . ?
C5 C7 1.425(6) . ?
C6 O4 1.222(5) . ?
C6 C23 1.580(6) . ?
C102 C8 1.461(7) . ?
C102 C18 1.516(6) . ?
C7 C104 1.444(7) . ?
C7 C20 1.465(6) . ?
C100 C11 1.463(6) . ?
C100 C21 1.515(6) . ?
C8 C101 1.405(6) . ?
C101 C11 1.391(6) . ?
C9 C15 1.458(6) . ?
C9 C17 1.526(6) . ?
O1 C33 1.231(6) . ?
C12 C104 1.352(6) . ?
C12 C15 1.419(6) . ?
C13 07 1.213(7) . ?
C13 08 1.261(8) . ?
C13 C39 1.453(7) . ?
C14 O5 1.209(7) . ?
C14 O6 1.256(8) . ?
C14 C200 1.491(7) . ?
010 C30 1.194(6) . ?
O2 C33 1.251(7) . ?
C24 C37 1.492(7) . ?
C26 C40 1.494(7) . ?
C28 C38 1.557(7) . ?
C29 C36 1.453(7) . ?
C30 09 1.267(7) . ?
C30 C39 1.504(8) . ?
C33 C200 1.489(7) . ?
 
loop_
 _geom_angle_atom_site_label_1
 _geom_angle_atom_site_label_2
 _geom_angle_atom_site_label_3
 _geom_angle
 _geom_angle_site_symmetry_1
 _geom_angle_site_symmetry_3
 _geom_angle_publ_flag
C4 N1 C3 122.6(3) . . ?
C26 N4 C23 110.0(3) . . ?
C26 N4 C24 114.2(4) . . ?
C23 N4 C24 112.6(4) . . ?
C6 N3 C5 123.9(3) . . ?
C22 N2 C29 109.0(4) . . ?
C22 N2 C28 111.9(4) . . ?
C29 N2 C28 114.6(4) . . ?
C102 C3 C100 119.4(4) . . ?
C102 C3 N1 120.2(3) . . ?
C100 C3 N1 120.4(4) . . ?
O3 C4 N1 121.1(4) . . ?
O3 C4 C22 123.2(4) . . ?
N1 C4 C22 115.7(3) . . ?
C9 C5 C7 119.3(4) . . ?
C9 C5 N3 118.3(4) . . ?
C7 C5 N3 122.4(3) . . ?
O4 C6 N3 123.0(4) . . ?
O4 C6 C23 120.5(4) . . ?
N3 C6 C23 116.4(4) . . ?
C3 C102 C8 119.7(4) . . ?
C3 C102 C18 117.8(4) . . ?
C8 C102 C18 122.5(4) . . ?
C5 C7 C104 122.6(4) . . ?
C5 C7 C20 118.2(4) . . ?
C104 C7 C20 119.2(4) . . ?
C3 C100 C11 118.9(4) . . ?
C3 C100 C21 118.4(4) . . ?
C11 C100 C21 122.6(4) . . ?
C101 C8 C102 122.2(4) . . ?
C11 C101 C8 116.5(4) . . ?
C5 C9 C15 116.4(4) . . ?
C5 C9 C17 118.2(4) . . ?
C15 C9 C17 125.3(4) . . ?
C101 C11 C100 123.3(4) . . ?
C104 C12 C15 116.6(4) . . ?
C12 C104 C7 119.7(4) . . ?
07 C13 08 123.7(6) . . ?
07 C13 C39 118.5(6) . . ?
08 C13 C39 117.8(6) . . ?
O5 C14 O6 119.0(6) . . ?
O5 C14 C200 121.8(7) . . ?
O6 C14 C200 119.2(6) . . ?
C12 C15 C9 125.3(4) . . ?
N2 C22 C4 111.1(3) . . ?
N4 C23 C6 112.1(4) . . ?
C37 C24 N4 115.5(4) . . ?
N4 C26 C40 111.9(4) . . ?
C38 C28 N2 117.2(4) . . ?
C36 C29 N2 111.2(5) . . ?
010 C30 09 119.9(6) . . ?
010 C30 C39 121.9(5) . . ?
09 C30 C39 118.1(6) . . ?
O1 C33 O2 121.3(5) . . ?
O1 C33 C200 125.1(5) . . ?
O2 C33 C200 113.5(6) . . ?
C13 C39 C30 117.2(5) . . ?
C33 C200 C14 120.9(5) . . ?
 
_diffrn_measured_fraction_theta_max    0.621
_diffrn_reflns_theta_full              25.00
_refine_diff_density_max    0.431
_refine_diff_density_min   -0.284
_refine_diff_density_rms    0.055
